# Supplementary material for: TMB (TM = Cr, Fe) monolayers: a new type of room temperature antiferromagnetic topological nodal line semimetal
Source: Royal Society of Chemistry journal article supplement (doi:10.1039/d5nh00224a), 2025-01-01
Supplement: d5nh00224a1.pdf [file d5nh00224a1.pdf]

## Supporting Information

### TMB (TM=Cr, Fe) Monolayers: A new Type of Room Temperature Antiferromagnetic Topological Nodal Line Semimetals

Chenqian Yan,<sup>1</sup> Yuqing Mao,<sup>1</sup> Jie Li,<sup>1</sup> Zijin Wang,<sup>1</sup> Ailei He,<sup>1\*</sup> Yuanyuan Duan,<sup>1</sup> Xiuyun Zhang<sup>1\*</sup>

<sup>1</sup>College of Physics Science and Technology, Yangzhou University, Yangzhou 225002, China.

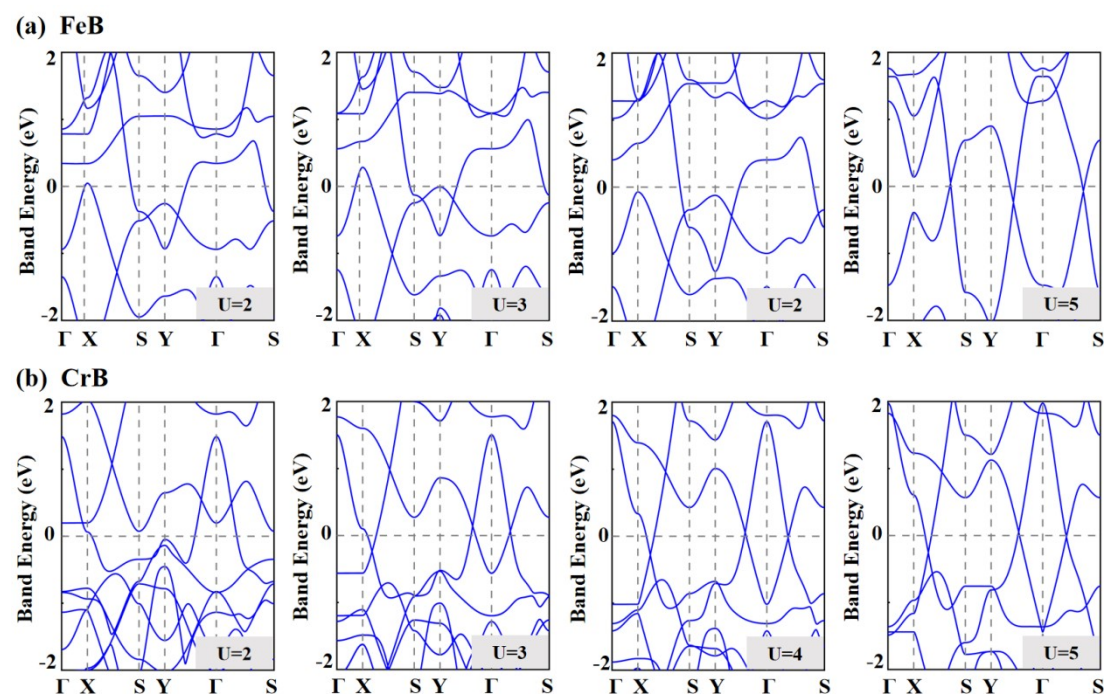

**Fig. S1.** (a) Band structures of FeB monolayer with different  $U$  values added. (b) Band structures of CrB monolayer with different  $U$  values added.

**TABLE S1.** The elastic constants of  $C_{11}$ ,  $C_{12}$ ,  $C_{22}$ , and  $C_{66}$  for FeB and CrB monolayers.

| System | $C_{11}$ (N/m) | $C_{12}$ (N/m) | $C_{22}$ (N/m) | $C_{66}$ (N/m) |
|--------|----------------|----------------|----------------|----------------|
| FeB    | 740.6917       | 413.7599       | 740.374        | 608.9664       |
| CrB    | 524.5973       | 378.0358       | 524.6856       | 444.3339       |

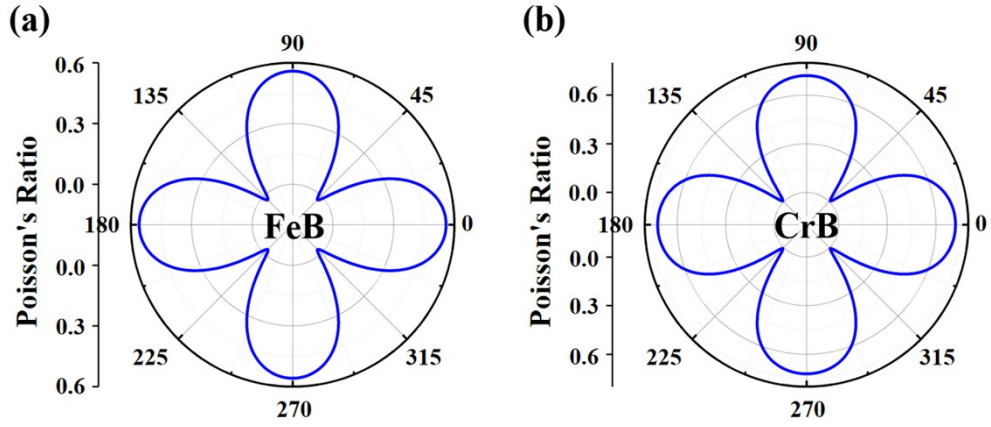

**Fig. S2.** Poisson's ratios of the FeB (a) and CrB (b) monolayers.

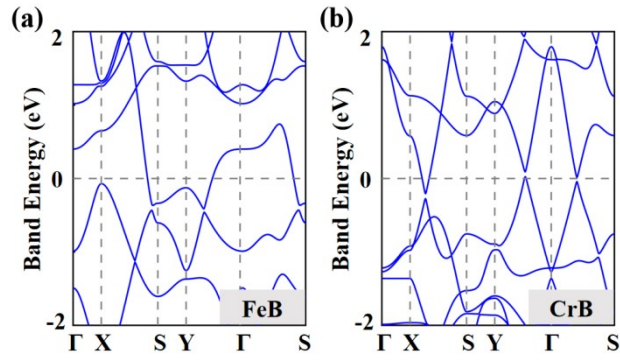

**Fig. S3.** The band structure of (a) FeB and (b) CrB monolayers with SOC applied along the z-direction.

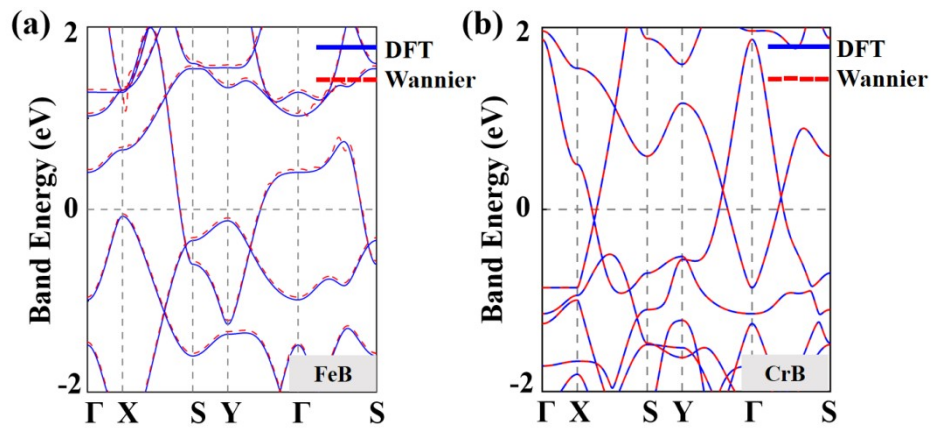

**Fig. S4.** Band structure of FeB (a) and CrB (b), and blue solid line and red dotted line are the results under DFT calculations and tight-binding model.

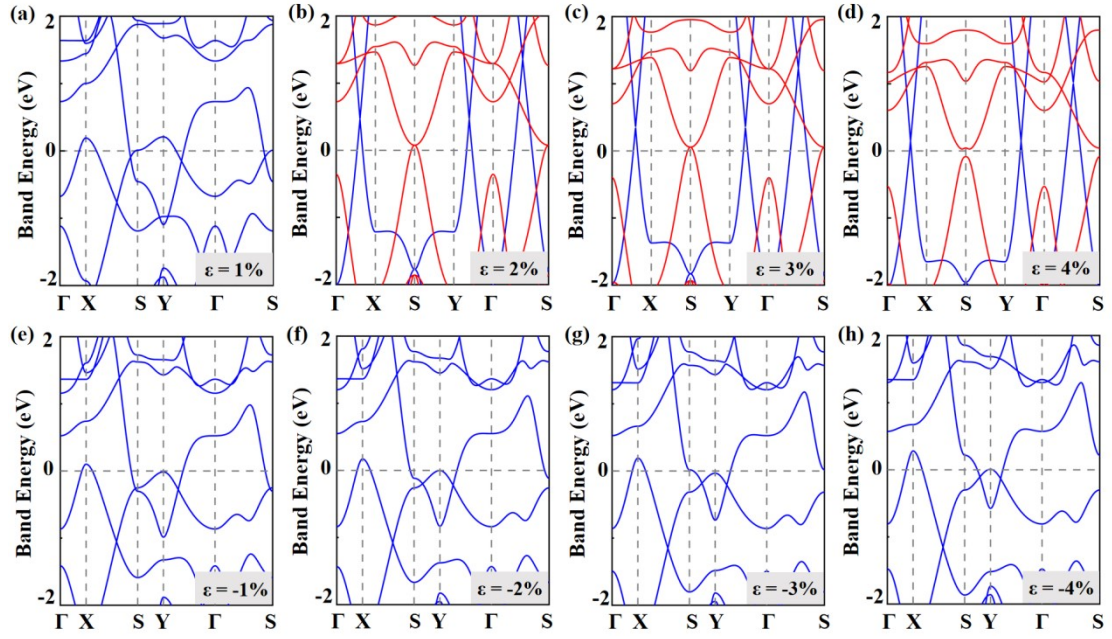

**Fig. S5.** The band structure of FeB monolayers in the range of  $\varepsilon = -4\%$  to  $4\%$ .

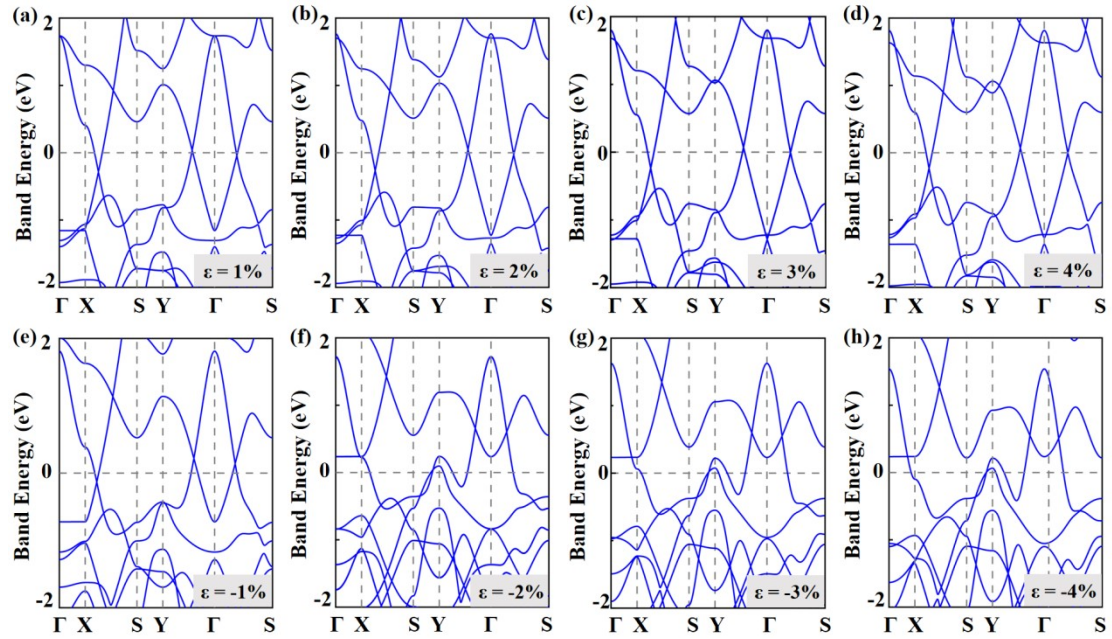

**Fig. S6.** The band structure of CrB monolayers in the range of  $\varepsilon = -4\%$  to  $4\%$ .

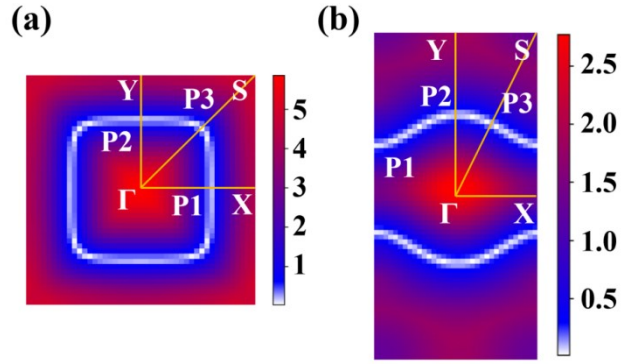

**Fig. S7.** The diagram of the gap size at Fermi level in BZ of FeB monolayer under tensile 2% strain (a) and CrB monolayer under tensile 3% strain (b).
